# Supplementary material
Source: PubMed Central journal article supplement (PMC3870741)
Supplement: 1316517110_pnas.201316517SI.pdf [file 1316517110_pnas.201316517SI.pdf]

# Supporting Information

Freed et al. 10.1073/pnas.1316517110

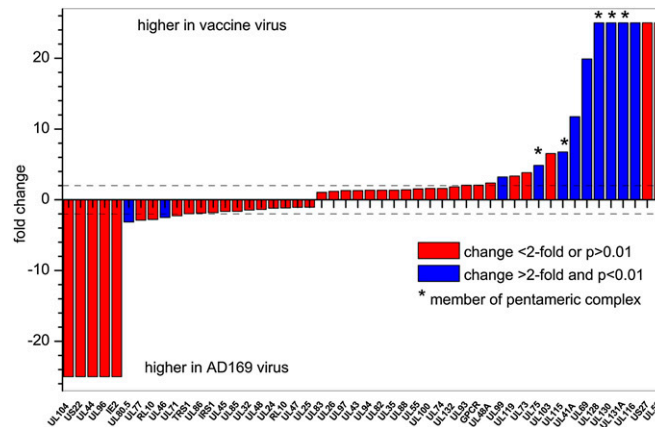

**Fig. S1.** Comparison of proteomic compositions of AD169 virus versus the vaccine virus. The protein composition of the parental strain AD169 and the experimental vaccine were determined by semiquantitative, label-free shotgun proteomics. Tryptic digests of each strain were analyzed in triplicate by nano-liquid chromatography-MS/MS. The analysis identified 50 viral proteins at a false-discovery rate of less than 0.5%. Label-free quantification was performed based on the peak height of identified MS signals and fold change values were calculated to differentiate AD169 and the experimental vaccine. An analysis of variance (ANOVA) was performed to identify statistically significant changes ( $P$  value  $< 0.01$ ). Fold changes were considered to be significant if they were higher than twofold or if the  $P$  value of the ANOVA analysis was below 0.01. Fold changes shown in red bars are not significant. Fold changes shown in blue bars are significant. Proteins that are exclusively identified in either one of the samples were artificially set to a fold change of  $\pm 25$  to visualize them. Members of the pentameric glycoprotein H (gH) complex are indicated with an asterisk. The guiding dashed lines indicate twofold change limits.

## A. Elite neutralizing antibodies

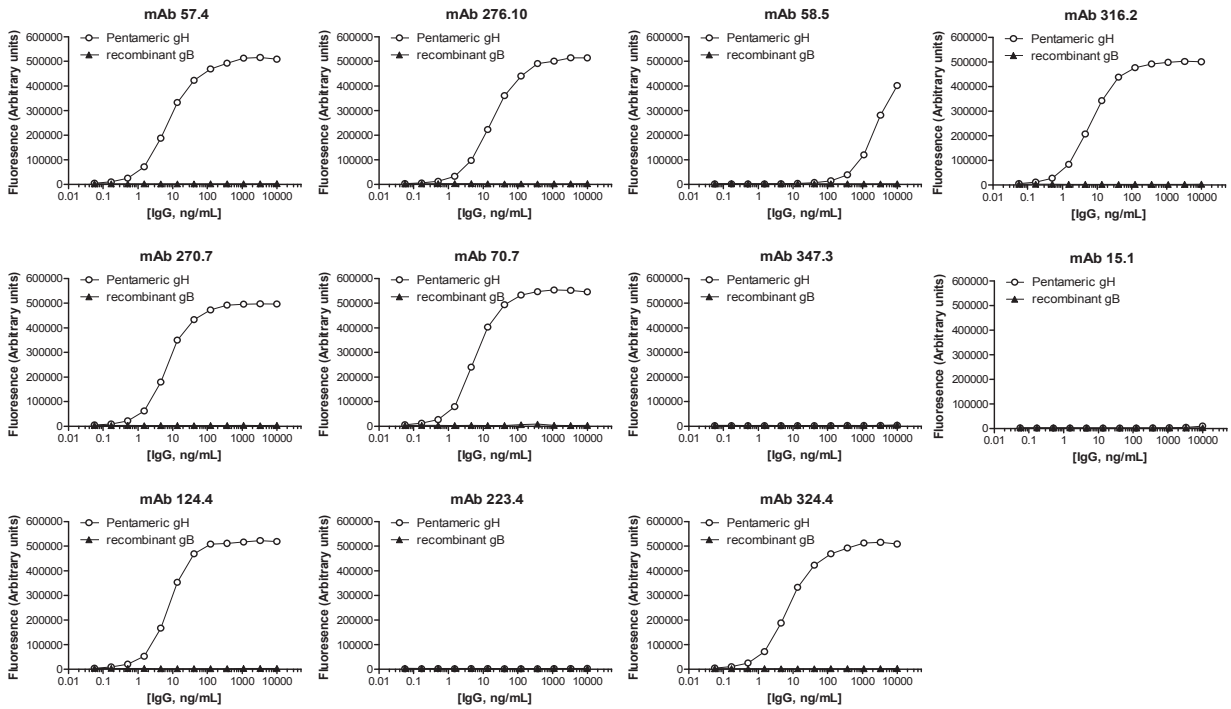

## B. Elite binding antibodies

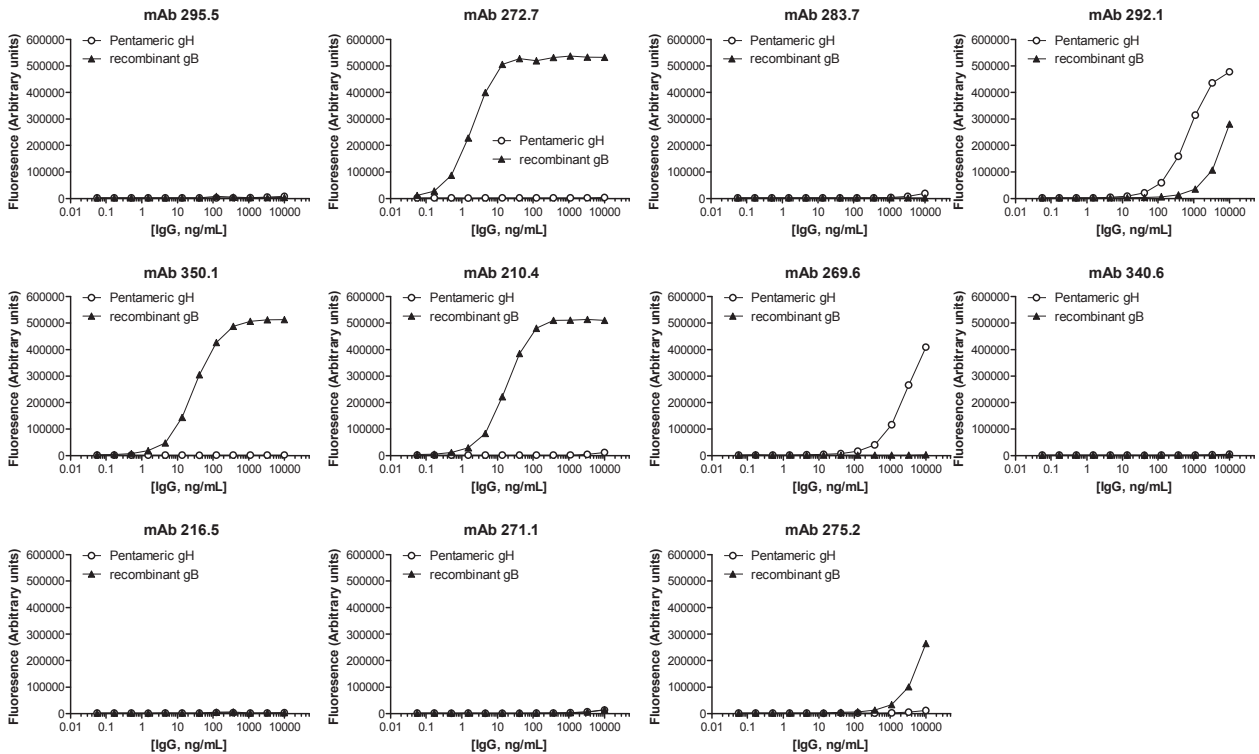

Fig. 52. Reactivity to recombinant glycoprotein B (gB) or recombinant pentameric gH complex by elite neutralizing and elite binding mAbs. Elite neutralizing antibodies (A) and elite binding antibodies (B) were tested for reactivity to recombinant gB or recombinant pentameric gH complex immobilized on plate (Materials and Methods).

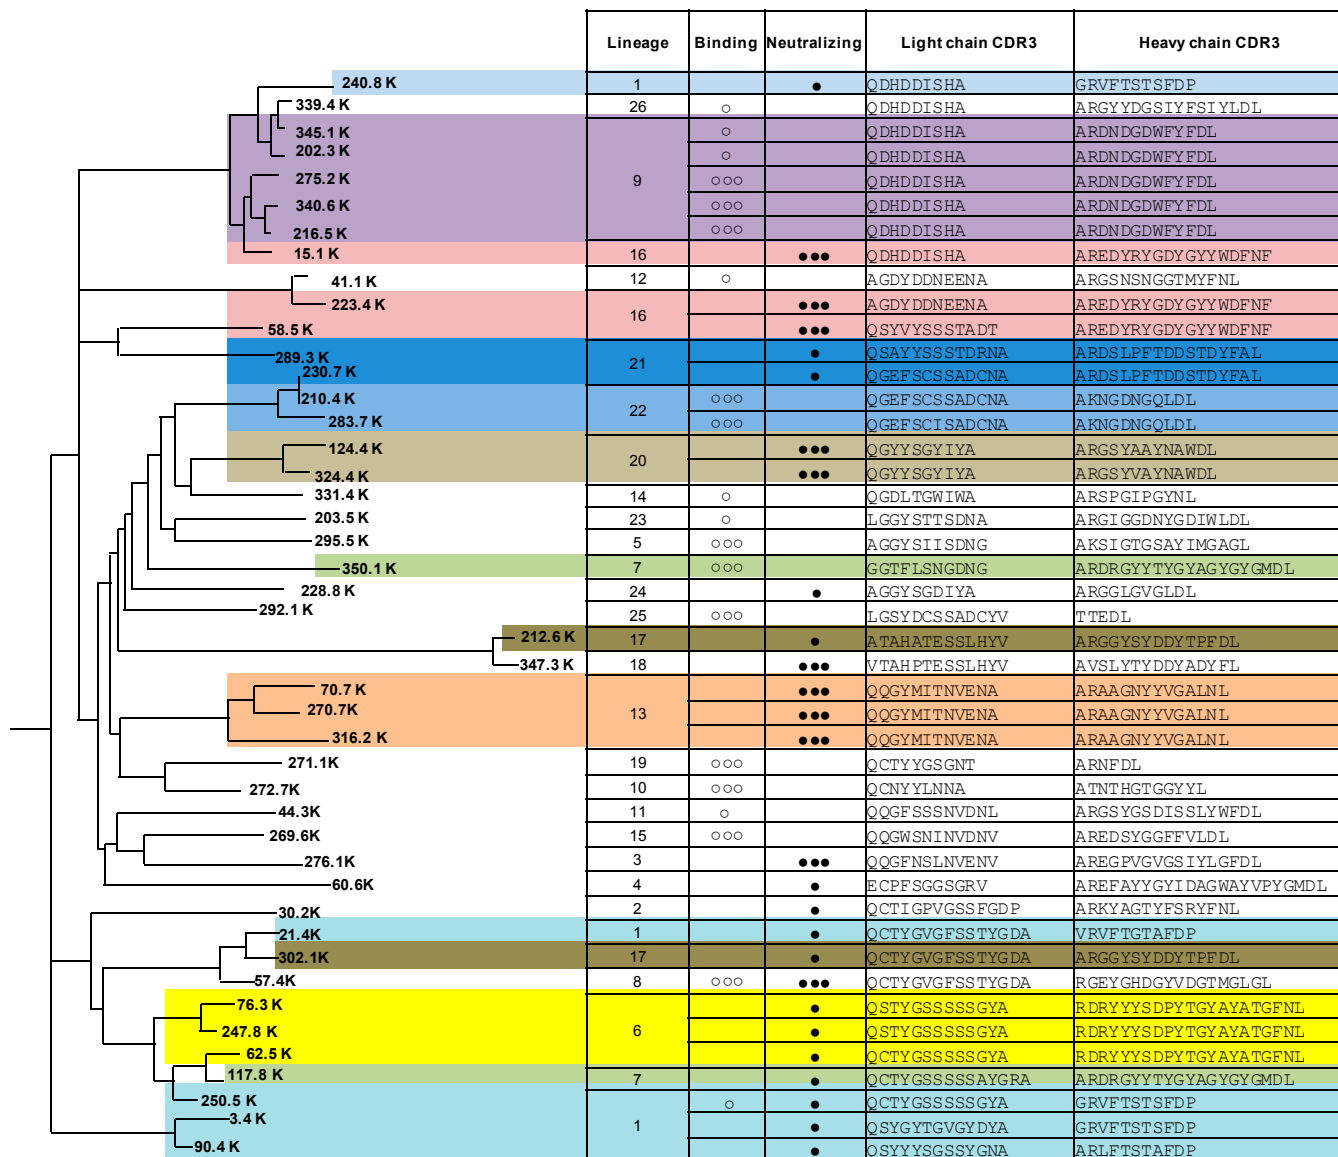

**Fig. S3.** Phylogenetic analysis of 45 rabbit mAbs and their lineages in correlation to their binding and neutralizing properties. Phylogenetic tree was constructed based on the entire light-chain variable-region amino acid sequence, and lineage groups were classified based on similarities in the heavy-chain complementarity-determining region 3 (CDR3) (Fig. 6). Lineage groups containing two or more mAbs are highlighted with different background colors. The solid dots identify neutralizing mAbs, with those of three dots indicating the elite neutralizing mAbs, whereas the open circles identify nonneutralizing mAbs, with those of three circles indicating the elite binding mAbs.

**Table S1. Binding and neutralizing properties for all 45 rabbit mAbs**

| Rabbit mAb clone ID | Binding to virus (EC <sub>50</sub> binding),<br>µg/mL | Neutralization in ARPE-19 cells<br>(EC <sub>50</sub> neutralizing), µg/mL | Neutralization in MRC-5 cells<br>(EC <sub>50</sub> neutralizing), µg/mL |
|---------------------|-------------------------------------------------------|---------------------------------------------------------------------------|-------------------------------------------------------------------------|
| 3.4                 | 2.13                                                  | 0.25                                                                      | 0.19                                                                    |
| 15.1                | 1.07                                                  | 0.03                                                                      | 100.00                                                                  |
| 21.4                | 2.58                                                  | 0.48                                                                      | 0.35                                                                    |
| 30.2                | 0.90                                                  | 0.45                                                                      | 0.20                                                                    |
| 41.1                | 0.18                                                  | 100.00                                                                    | 100.00                                                                  |
| 44.3                | 8.79                                                  | 3.13                                                                      | 100.00                                                                  |
| 57.4/57.4           | 0.09                                                  | 0.01                                                                      | 100.00                                                                  |
| 58.5                | 0.59                                                  | 0.02                                                                      | 100.00                                                                  |
| 60.6                | 0.55                                                  | 0.13                                                                      | 0.08                                                                    |
| 62.5                | 0.84                                                  | 0.20                                                                      | 100.00                                                                  |
| 70.7                | 1.46                                                  | 0.03                                                                      | 0.09                                                                    |
| 76.3                | 0.75                                                  | 0.23                                                                      | 0.47                                                                    |
| 90.4                | 2.81                                                  | 0.47                                                                      | 0.23                                                                    |
| 117.8               | 1.66                                                  | 0.27                                                                      | 1.47                                                                    |
| 124.4               | 1.72                                                  | 0.05                                                                      | 0.08                                                                    |
| 202.3               | 0.10                                                  | 10.00                                                                     | 100.00                                                                  |
| 203.5               | 4.03                                                  | 17.03                                                                     | 100.00                                                                  |
| 210.4               | 0.03                                                  | 100.00                                                                    | 100.00                                                                  |
| 212.6               | 52.91                                                 | 3.71                                                                      | 100.00                                                                  |
| 216.5               | 0.06                                                  | 100.00                                                                    | 100.00                                                                  |
| 223.4               | 1.54                                                  | 0.06                                                                      | 100.00                                                                  |
| 228.8               | 3.34                                                  | 0.28                                                                      | 0.25                                                                    |
| 230.7               | 0.27                                                  | 0.34                                                                      | 0.34                                                                    |
| 240.8               | 2.60                                                  | 0.79                                                                      | 100.00                                                                  |
| 247.8               | 0.76                                                  | 0.16                                                                      | 0.28                                                                    |
| 250.5               | 5.27                                                  | 2.31                                                                      | 1.26                                                                    |
| 269.6               | 0.03                                                  | 100.00                                                                    | 100.00                                                                  |
| 270.7               | 0.68                                                  | 0.02                                                                      | 0.06                                                                    |
| 271.1               | 0.07                                                  | 39.66                                                                     | 100.00                                                                  |
| 272.7               | 0.01                                                  | 100.00                                                                    | 100.00                                                                  |
| 275.2               | 0.10                                                  | 100.00                                                                    | 100.00                                                                  |
| 276.10              | 0.25                                                  | 0.01                                                                      | 100.00                                                                  |
| 283.7               | 0.01                                                  | 100.00                                                                    | 100.00                                                                  |
| 289.3               | 4.83                                                  | 0.76                                                                      | 0.59                                                                    |
| 292.1               | 0.02                                                  | 68.67                                                                     | 100.00                                                                  |
| 295.5               | 0.00                                                  | 100.00                                                                    | 100.00                                                                  |
| 302.1               | 4.74                                                  | 0.75                                                                      | 100.00                                                                  |
| 316.2               | 1.06                                                  | 0.02                                                                      | 0.08                                                                    |
| 324.4               | 4.09                                                  | 0.10                                                                      | 0.21                                                                    |
| 331.4               | 100.00                                                | 100.00                                                                    | 100.00                                                                  |
| 339.4               | 2.36                                                  | 100.00                                                                    | 100.00                                                                  |
| 340.6               | 0.05                                                  | 100.00                                                                    | 100.00                                                                  |
| 345.1               | 0.11                                                  | 100.00                                                                    | 100.00                                                                  |
| 347.3               | 0.34                                                  | 0.03                                                                      | 100.00                                                                  |
| 350.1               | 0.02                                                  | 100.00                                                                    | 100.00                                                                  |

All antibodies are sorted based on their clone ID, numerically. Binding and neutralizing properties for each antibody are expressed as the IgG concentration to achieve 50% of the desired functional measure. All EC<sub>50</sub> values were obtained by four-parameter curve fitting, with  $R^2 \geq 0.90$ . An arbitrary value of 100 µg/mL was assigned if the fitting was unconverged as described in *Materials and Methods*. Elite neutralizing and elite binding antibodies are marked in red and blue, respectively, and the designation is based on their  $\geq 10$ -fold higher neutralizing or binding activity than those of CytoGam (Fig. 2 A and B). mAb 57.4 is an elite neutralizing and binding antibody.

**Table S2. Somatic mutational rates for all 45 mAbs**

|                                                                          | mAb ID | V <sub>H</sub> aa | No. changes, aa | % mutation |                    | V <sub>L</sub> aa | No. changes, aa | % mutation |                    |
|--------------------------------------------------------------------------|--------|-------------------|-----------------|------------|--------------------|-------------------|-----------------|------------|--------------------|
| Neutralizing mAb                                                         | 57.4.  | 106               | 33              | 0.31       |                    | 113               | 21              | 0.19       |                    |
| (listed in ascending order based on their EC <sub>50</sub> neutralizing) | 276.1. | 106               | 13              | 0.12       |                    | 109               | 21              | 0.19       |                    |
|                                                                          | 58.5.  | 106               | 10              | 0.09       |                    | 111               | 17              | 0.15       |                    |
|                                                                          | 316.2. | 106               | 16              | 0.15       |                    | 113               | 21              | 0.19       |                    |
|                                                                          | 270.7. | 106               | 16              | 0.15       |                    | 113               | 16              | 0.14       |                    |
|                                                                          | 70.7.  | 106               | 15              | 0.14       |                    | 113               | 17              | 0.15       |                    |
|                                                                          | 347.3. | 105               | 10              | 0.10       |                    | 115               | 8               | 0.07       |                    |
|                                                                          | 15.1.  | 106               | 9               | 0.08       |                    | 113               | 21              | 0.19       |                    |
|                                                                          | 124.4. | 106               | 14              | 0.13       |                    | 112               | 11              | 0.10       |                    |
|                                                                          | 223.4. | 106               | 10              | 0.09       |                    | 111               | 20              | 0.18       |                    |
|                                                                          | 324.4. | 106               | 11              | 0.10       |                    | 112               | 8               | 0.07       |                    |
|                                                                          | 60.6.  | 106               | 11              | 0.10       |                    | 114               | 26              | 0.23       |                    |
|                                                                          | 247.8. | 103               | 30              | 0.29       |                    | 114               | 17              | 0.15       |                    |
|                                                                          | 62.5.  | 103               | 28              | 0.27       |                    | 114               | 16              | 0.14       |                    |
|                                                                          | 76.3.  | 103               | 28              | 0.27       |                    | 114               | 18              | 0.16       |                    |
|                                                                          | 3.4.   | 104               | 23              | 0.22       |                    | 111               | 25              | 0.23       |                    |
|                                                                          | 117.8. | 106               | 5               | 0.05       |                    | 114               | 15              | 0.13       |                    |
|                                                                          | 228.8. | 106               | 12              | 0.11       |                    | 112               | 19              | 0.17       |                    |
|                                                                          | 230.7. | 106               | 10              | 0.09       |                    | 115               | 11              | 0.10       |                    |
|                                                                          | 30.2.  | 106               | 26              | 0.25       |                    | 113               | 24              | 0.21       |                    |
|                                                                          | 90.4.  | 104               | 18              | 0.17       |                    | 112               | 15              | 0.13       |                    |
|                                                                          | 21.4.  | 104               | 21              | 0.20       |                    | 113               | 20              | 0.18       |                    |
|                                                                          | 302.1. | 106               | 5               | 0.05       |                    | 113               | 22              | 0.19       |                    |
|                                                                          | 289.3. | 106               | 11              | 0.10       |                    | 111               | 18              | 0.16       |                    |
|                                                                          | 240.8. | 104               | 24              | 0.23       |                    | 112               | 24              | 0.21       |                    |
|                                                                          |        |                   | Average =       | 0.16       | (CI: 0.122, 0.187) |                   | Average =       | 0.16       | (CI: 0.142, 0.179) |
| Nonneutralizing mAb                                                      | 295.5. | 105               | 16              | 0.15       |                    | 111               | 16              | 0.14       |                    |
| (listed in ascending order based on their EC <sub>50</sub> binding)      | 272.7. | 104               | 21              | 0.20       |                    | 110               | 16              | 0.15       |                    |
|                                                                          | 283.7. | 105               | 6               | 0.06       |                    | 115               | 12              | 0.10       |                    |
|                                                                          | 292.1. | 105               | 14              | 0.13       |                    | 115               | 14              | 0.12       |                    |
|                                                                          | 350.1. | 106               | 5               | 0.05       |                    | 111               | 20              | 0.18       |                    |
|                                                                          | 210.4. | 105               | 6               | 0.06       |                    | 115               | 11              | 0.10       |                    |
|                                                                          | 269.6. | 106               | 16              | 0.15       |                    | 113               | 24              | 0.21       |                    |
|                                                                          | 340.6. | 106               | 22              | 0.21       |                    | 113               | 23              | 0.20       |                    |
|                                                                          | 216.5. | 106               | 21              | 0.20       |                    | 113               | 23              | 0.20       |                    |
|                                                                          | 271.1. | 106               | 12              | 0.11       |                    | 111               | 18              | 0.16       |                    |
|                                                                          | 275.2. | 106               | 18              | 0.17       |                    | 113               | 22              | 0.19       |                    |
|                                                                          | 202.3. | 106               | 20              | 0.19       |                    | 113               | 23              | 0.20       |                    |
|                                                                          | 345.1. | 106               | 17              | 0.16       |                    | 113               | 21              | 0.19       |                    |
|                                                                          | 41.1.  | 106               | 14              | 0.13       |                    | 111               | 19              | 0.17       |                    |
|                                                                          | 339.4. | 106               | 7               | 0.07       |                    | 113               | 22              | 0.19       |                    |
|                                                                          | 203.5. | 105               | 11              | 0.10       |                    | 111               | 16              | 0.14       |                    |
|                                                                          | 250.5. | 104               | 24              | 0.23       |                    | 114               | 14              | 0.12       |                    |
|                                                                          | 44.3.  | 106               | 17              | 0.16       |                    | 114               | 23              | 0.20       |                    |
|                                                                          | 212.6. | 106               | 3               | 0.03       |                    | 115               | 4               | 0.03       |                    |
|                                                                          | 331.4. | 106               | 11              | 0.10       |                    | 111               | 14              | 0.13       |                    |
|                                                                          |        |                   | Average =       | 0.13       | (CI: 0.106, 0.161) |                   | Average =       | 0.16       | (CI: 0.134, 0.178) |

Neutralizing mAbs are sorted based on their neutralizing capacity (EC<sub>50</sub> neutralizing), whereas nonneutralizing mAbs are sorted based on their binding affinity (EC<sub>50</sub> binding). Number of changes in V<sub>H</sub> or V<sub>L</sub> regions are determined based on IMGT database. CI, 95% confidence interval.
